# Supplementary material for: The Ethanol Extract of Evodiae Fructus and Its Ingredient, Rutaecarpine, Inhibit Infection of SARS-CoV-2 and Inflammatory Responses
Source: MDPI journal article supplement (doi:10.3390/ijms24010762), 2023-01-01
Supplement: s1 [file s1]

## **The Ethanol Extract of Evodiae Fructus and Its Ingredient, Rutaecarpine, Inhibit Infection of SARS-CoV-2 and Inflammatory Responses**

Shengying Lin <sup>1,2</sup>, Xiaoyang Wang <sup>1,2</sup>, Hongsheng Guo <sup>1,2</sup>, Niyu Dai <sup>1,2</sup>, Roy Wai-Lun Tang <sup>1,2</sup>, Hung Chun Lee <sup>1,2</sup>, Ka Wing Leung <sup>1,2</sup>, Tina Ting-Xia Dong <sup>1,2</sup>, Sarah E. Webb <sup>2</sup>, Andrew L. Miller <sup>2</sup> and Karl Wah-Keung Tsim <sup>1,2,\*</sup>

<sup>1</sup> Center for Chinese Medicine, Division of Life Science, The Hong Kong University of Science and Technology, Clear Water Bay, Kowloon, Hong Kong, China

<sup>2</sup> State Key Laboratory of Molecular Neuroscience, The Hong Kong University of Science and Technology, Hong Kong, China

### **Correspondence**

Prof. Karl Wah-Keung Tsim, Center for Chinese Medicine, Division of Life Science, The Hong Kong University of Science and Technology, Clear Water Bay, Hong Kong, China

Tel.: +852-2358-7332

Fax: +852-2358-1552

Email: botsim@ust.hk

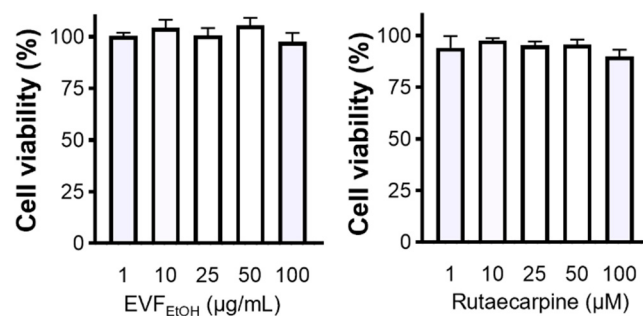

**Figure S1: Bar charts showing the viability of cells following treatment with EVF<sub>EtOH</sub> or rutaecarpine.** EVF<sub>EtOH</sub> was tested at final concentrations of 1, 10, 25, 50, and 100 µg/mL, whereas rutaecarpine was tested at final concentrations of 1, 10, 25, 50 and 100 µM. MTT solution was applied to give a final concentration of 0.5 mg/mL, after which the optical density was determined at 570 nm. The data show mean  $\pm$  SD percentage to control (with no drug treatments) and  $n = 4$ .

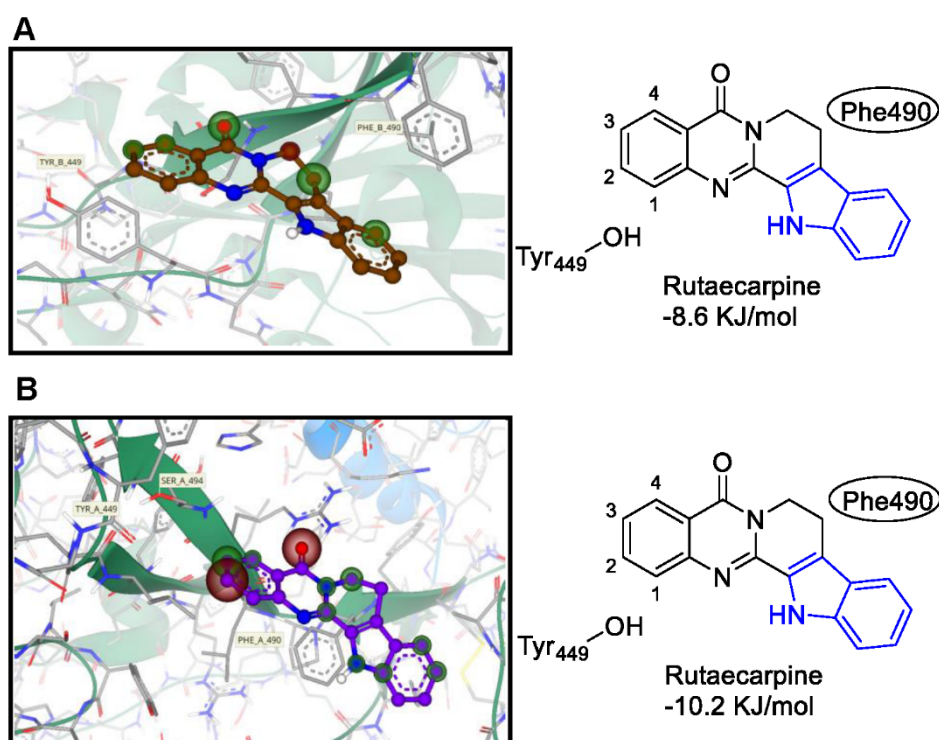

**Figure S2: Docking study of rutaecarpine against the S-protein of wild-type and omicron SARS-CoV-2. (A)** The receptor binding domain (RBD, residues 438-506) in the wild-type S-protein (PDB code: 6LZG) was determined to be the binding site. The chemical structures were downloaded from PubChem (<https://pubchem.ncbi.nlm.nih.gov/>). **(B)** The RBD (residues 438-506) of the omicron S-protein (PDB code: 7T9L) was determined to be the binding site. The binding energies are indicated in KJ/mol.
